# Supplementary material for: Enhanced charge transfer and separation of hierarchical hydrogenated TiO2 nanothorns/carbon nanofibers composites decorated by NiS quantum dots for remarkable photocatalytic H2 production activity
Source: Royal Society of Chemistry journal article supplement (doi:10.1039/c7nr09415a), 2018-01-01
Supplement: c7nr09415a1.pdf [file c7nr09415a1.pdf]

## **Electronic supplementary information**

### **Enhanced charge transfer and separation of hierarchical hydrogenated TiO<sub>2</sub> nanothorns/carbon nanofibers composites decorated by NiS quantum dots for remarkable photocatalytic H<sub>2</sub> production activity**

Xin Zhang, Yajie Chen,\* yuting Xiao, Wei Zhou, Guohui Tian\* and Honggang Fu

Key Laboratory of Functional Inorganic Material Chemistry, Ministry of Education of the People's Republic of China; School of Chemistry and Materials Science, Heilongjiang University, 150080 Harbin P. R. China.

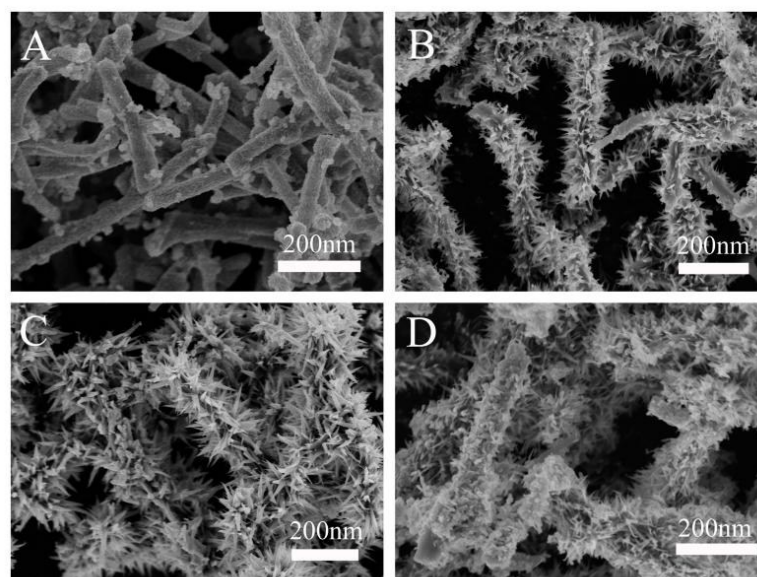

**Fig. S1** SEM images of H-TiO<sub>2</sub>/CNFs precursors prepared from different reaction time. (A) 0.5 h, (B) 6 h, (C) 12 h, and 24 h.

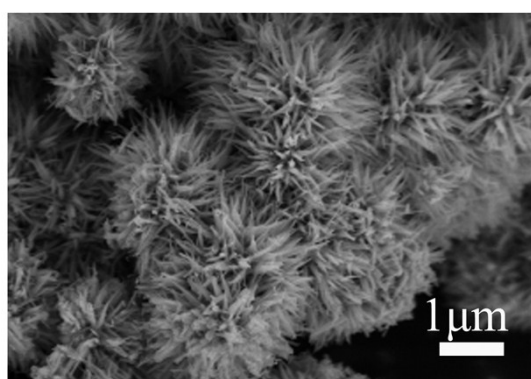

**Fig. S2.** SEM image of the pure TiO<sub>2</sub> precursor.

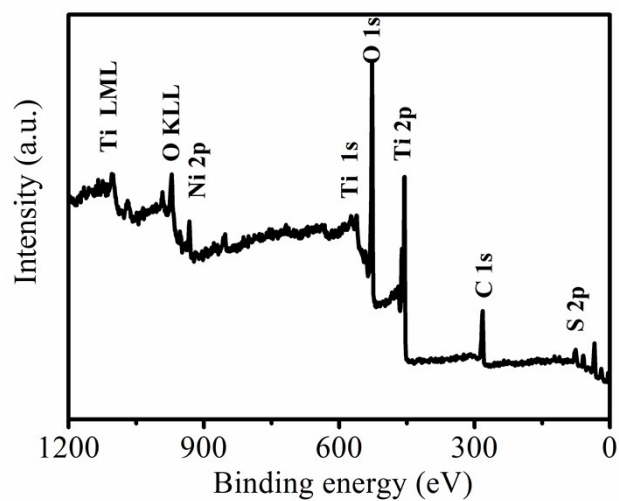

**Fig. S3.** The survey XPS spectrum of the NiS/H-TiO<sub>2</sub>/CNFs.

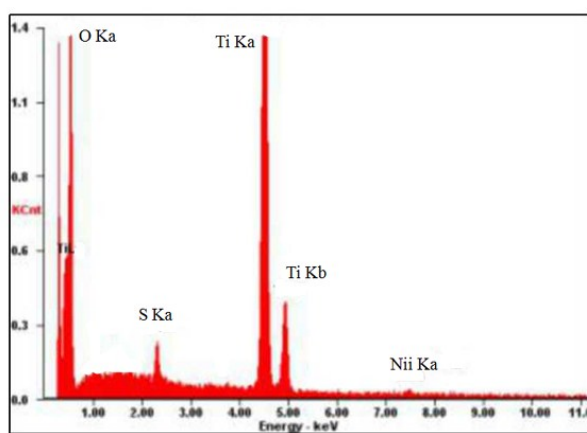

**Fig. S4.** The energy dispersive spectrum (EDS) of the NiS/H-TiO<sub>2</sub>/CNFs.

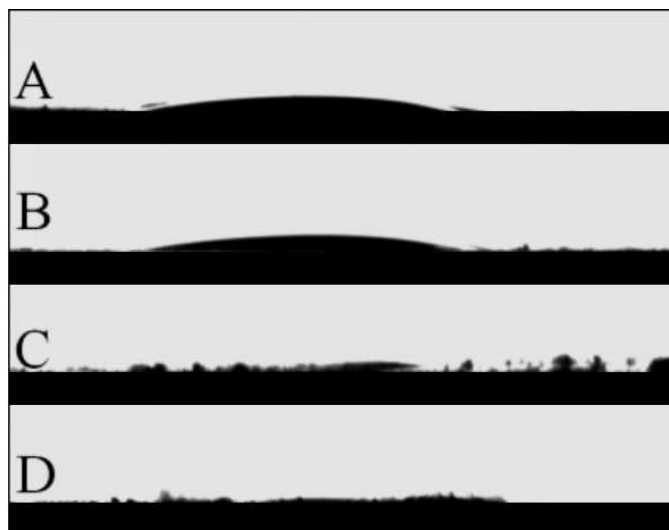

**Fig. S5.** (A), (B), (C) and (D) are the water contact angle photographs of  $\text{TiO}_2$ ,  $\text{TiO}_2/\text{CNFs}$ ,  $\text{H-TiO}_2/\text{CNFs}$ , and  $\text{NiS/H-TiO}_2/\text{CNFs}$  after AM 1.5 irradiation, respectively.

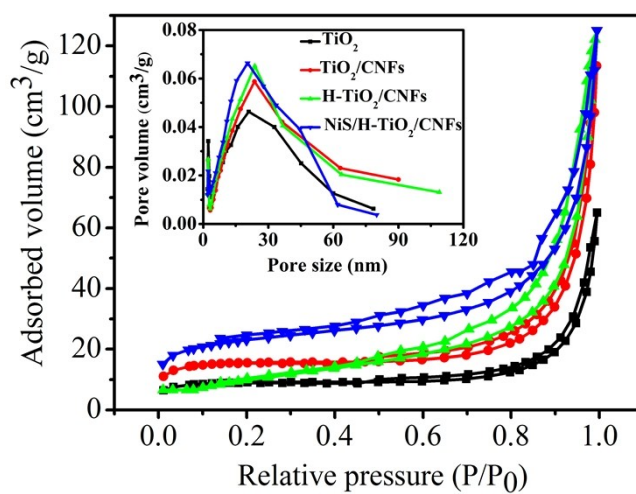

**Fig. S6.** Nitrogen adsorption-desorption isotherms and the pore size distribution plots (inset) of  $\text{TiO}_2$ ,  $\text{TiO}_2/\text{CNFs}$ ,  $\text{H-TiO}_2/\text{CNFs}$ , and  $\text{NiS/H-TiO}_2/\text{CNFs}$ .

**Table S1** Summary of the photoluminescence decay time ( $\tau$ ) and their relative intensities of the different samples.

| sample                       | $\tau_1$ (ns) | $\tau_2$ (ns) | $I_1$ (%) | $I_2$ (%) | Average lifetime ( $\tau$ , ns) |
|------------------------------|---------------|---------------|-----------|-----------|---------------------------------|
| NiS/H-TiO <sub>2</sub> /CNFs | 3.93          | 8.07          | 35.52     | 64.48     | 7.19                            |
| H-TiO <sub>2</sub> /CNFs     | 3.75          | 7.41          | 36.95     | 63.05     | 6.57                            |
| TiO <sub>2</sub> /CNFs       | 3.50          | 6.33          | 38.27     | 61.73     | 5.61                            |
| TiO <sub>2</sub>             | 3.64          | 5.96          | 39.99     | 60.01     | 5.29                            |

The average lifetime was calculated using equation:  $\langle\tau\rangle=(I_1\tau_1^2 + I_2\tau_2^2)/(I_1\tau_1 + I_2\tau_2)$

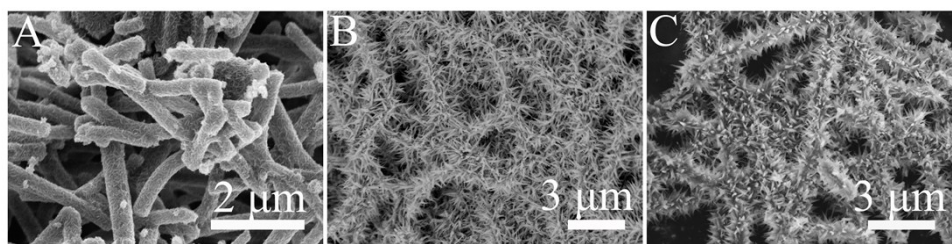

**Fig. S7.** (A), (B), and (C) are SEM images of TiO<sub>2</sub>/CNFs prepared from 30, 20, and 10 mg carbon fibers, respectively.

We control the relative content of TiO<sub>2</sub> and CNFs according to the dosage of carbon fiber (CNFs) under the fixed 0.5 mL tetrabutyl titanate. The TiO<sub>2</sub>/CNFs prepared from 10, 20, 30 mg CNFs were obtained. The SEM images were shown in Fig. S7. When the CNFs content is high, there are fewer TiO<sub>2</sub> nanorods grown on the surface of CNFs. With the decrease of CNFs amount, more TiO<sub>2</sub> nanorods can be found.

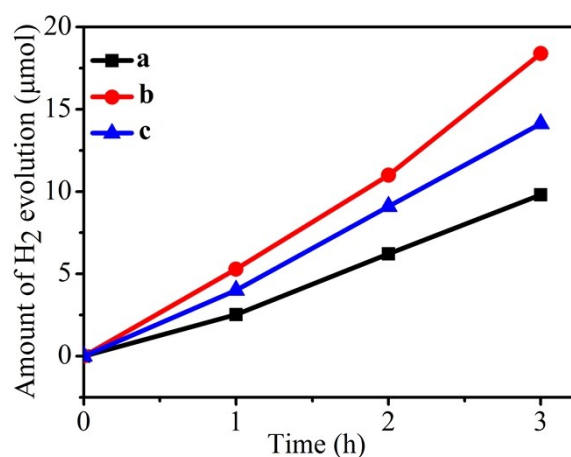

**Fig. S8.** The photocatalytic H<sub>2</sub> evolution activities of TiO<sub>2</sub>/CNFs prepared from 10 (a), 20 (b), and 30 mg (c) carbon fibers, respectively.

The relative content of TiO<sub>2</sub> and CNFs also influence the photocatalytic activity (Fig. S8). Only proper content of TiO<sub>2</sub> and CNFs can exhibit optimal photocatalytic activity. When the content of CNFs is too high, there would have strong shading effect of CNFs. Meanwhile, the amount of TiO<sub>2</sub> catalyst is relatively low (Fig. S7A). So the photocatalytic hydrogen evolution activity is relative low. When the content of CNFs is too low, additional TiO<sub>2</sub> separated from CNFs can exist (Fig. S7C). There would have relatively weak interaction between TiO<sub>2</sub> and CNFs, not contributing to the photogenerated charge transfer and separation, leading to the decrease of photocatalytic hydrogen evolution activity.

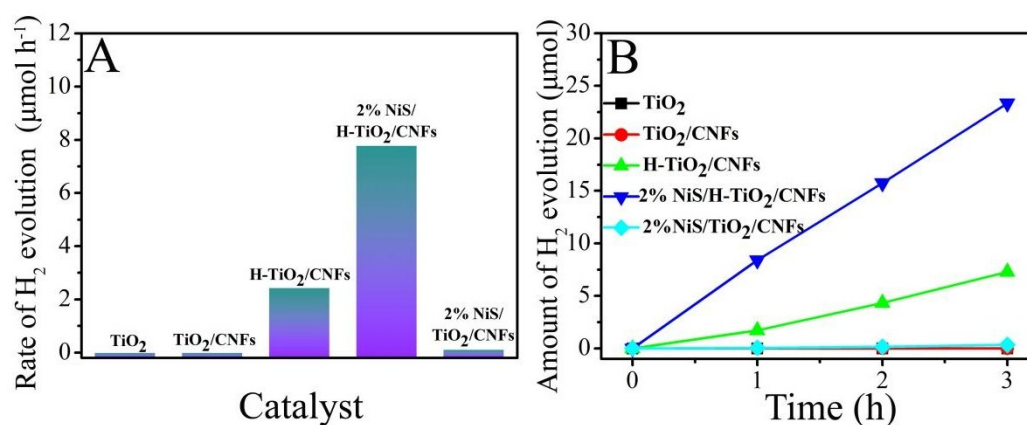

**Fig. S9.** The photocatalytic H<sub>2</sub> evolution activities of these catalysts under visible light irradiation ( $\lambda > 420$  nm).

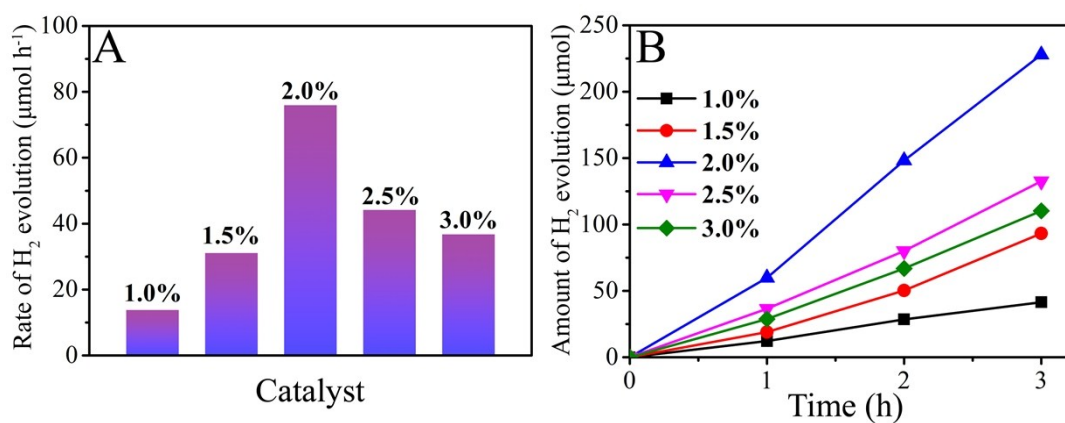

**Fig. S10.** The photocatalytic H<sub>2</sub> evolution rates of the NiS/H-TiO<sub>2</sub>/CNFs with different NiS contents (A). The amounts of photocatalytic H<sub>2</sub> evolution plotted against AM1.5 irradiation time.

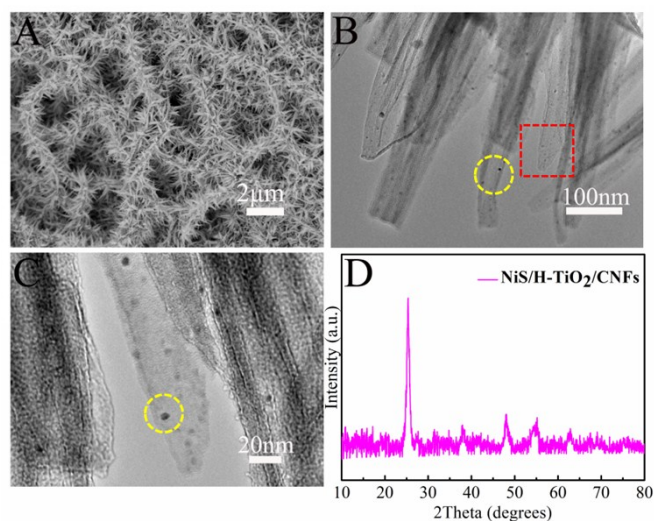

**Fig. S11.** SEM image (A), TEM images (B, C), and XRD pattern of the NiS/H-TiO<sub>2</sub>/CNFs after photocatalytic H<sub>2</sub> evolution reaction.

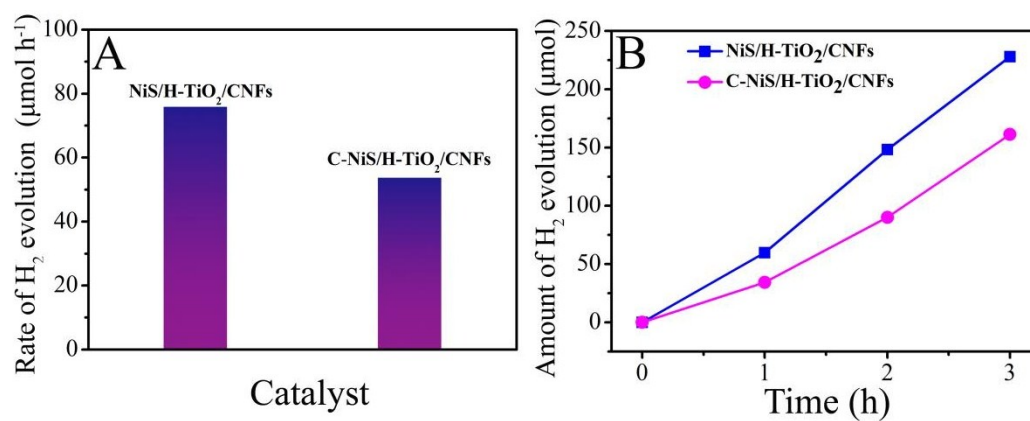

**Fig. S12.** Comparison of the photocatalytic H<sub>2</sub> evolution rate of NiS/H-TiO<sub>2</sub>/CNFs and the crushed NiS/H-TiO<sub>2</sub>/CNFs (C-NiS/H-TiO<sub>2</sub>/CNFs) (A), and corresponding amounts of photocatalytic H<sub>2</sub> evolution plotted against AM1.5 irradiation time (B).



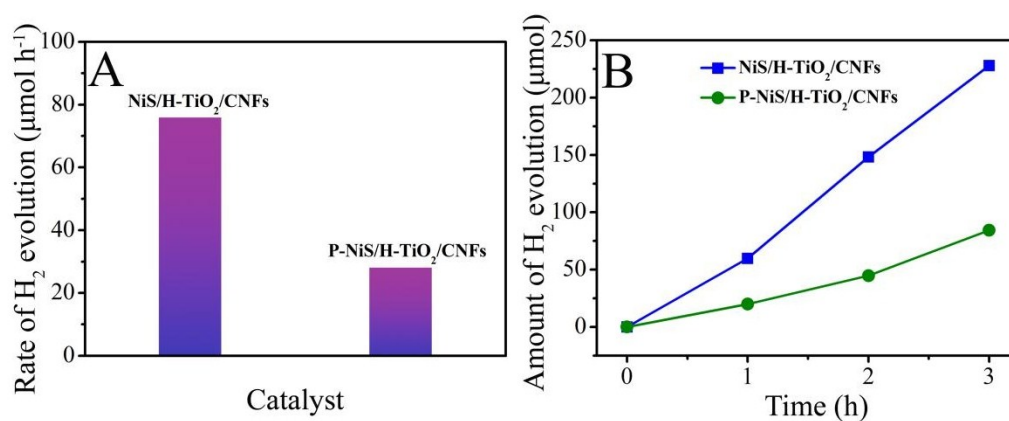

**Fig. S13.** Comparison of the photocatalytic H<sub>2</sub> evolution rate of NiS/H-TiO<sub>2</sub>/CNFs (a) and the physically mixed NiS/H-TiO<sub>2</sub> and CNFs (b) (A), and corresponding amounts of photocatalytic H<sub>2</sub> evolution plotted against AM1.5 irradiation time (B).
